# Supplementary material
Source: PubMed Central journal article supplement (PMC6307884)
Supplement: develop-145-170142-s1.pdf [file develop-145-170142-s1.pdf]

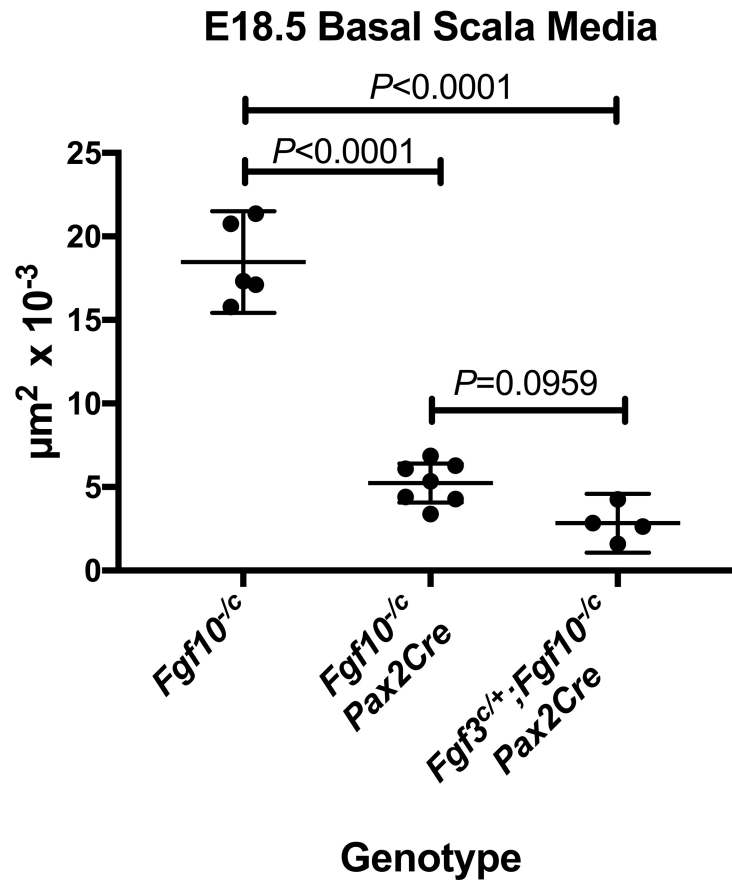

**Figure S1. Removing one copy of *Fgf3* from the F10cKO background does not significantly affect the area of the scala media.** Scala media area (µm<sup>2</sup>) was determined for three genotypes, *Fgf10<sup>-/-</sup>* (controls, n=5, not shown in Fig. 2), *Fgf10<sup>-/-</sup>; Pax2-Cre/+* (F10CKO, n=6; Fig. 2G) and *Fgf3<sup>c/+</sup>; Fgf10<sup>-/-</sup>; Pax2-Cre/+* (F3cHet;F10CKO, n=4; Fig. 2R). Mean and 95% confidence intervals are indicated. One-way ANOVA with Tukey's multiple comparisons test was used to calculate significance.

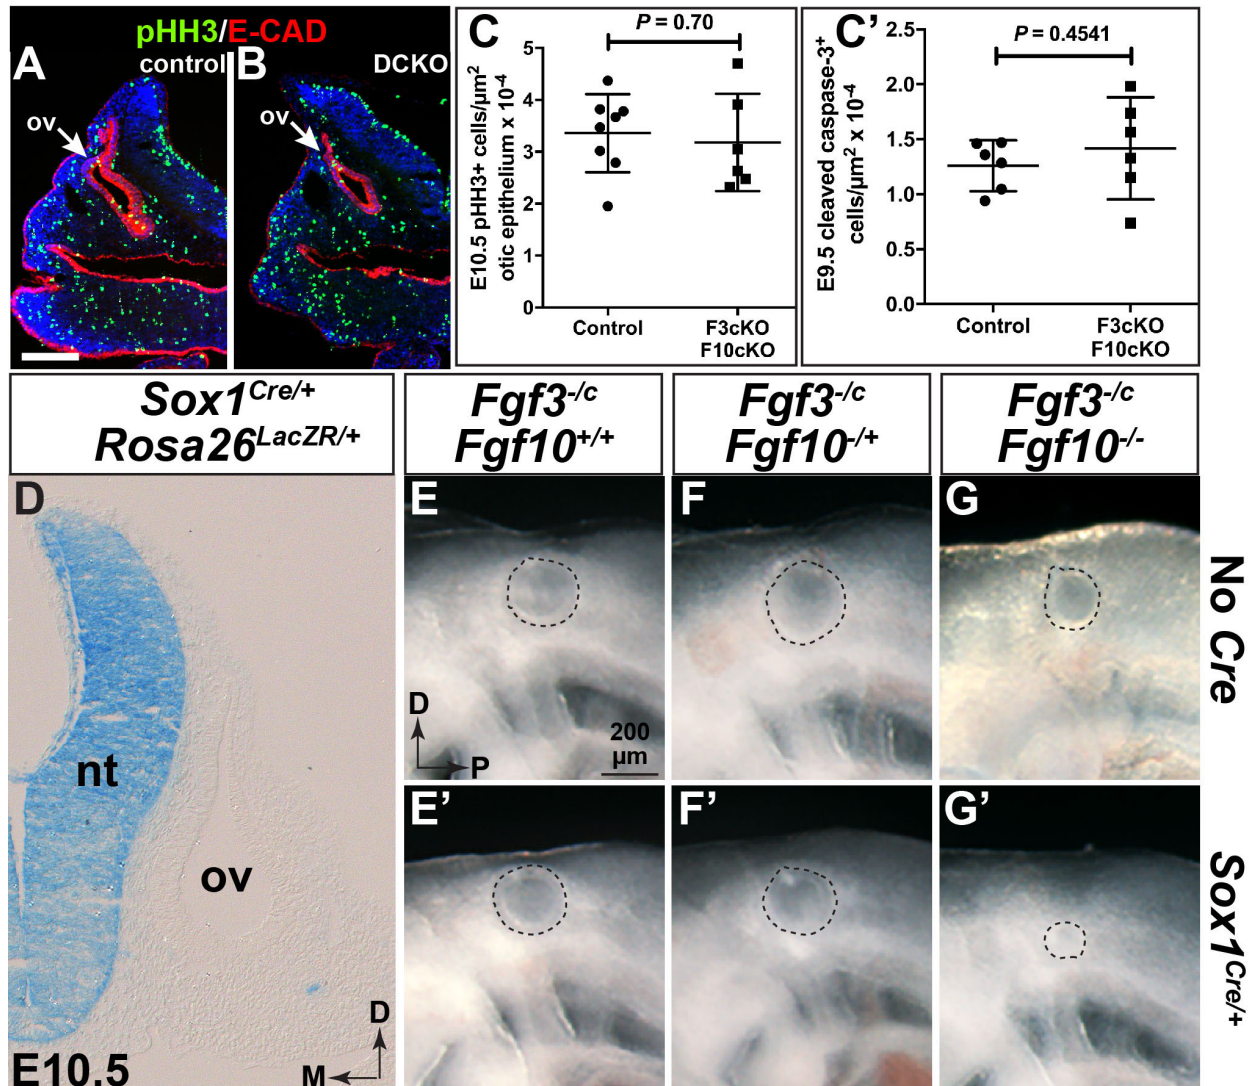

**Figure S2.** *Fgf3* and *Fgf10* are not required in the *Pax2-Cre* lineage for early otocyst proliferation or survival, likely because *Fgf3* expression persists in the hindbrain, where it is required for development of a normally sized otic vesicle. (A,B) Transverse cryosections of E10.5 control (*Fgf3<sup>-/-</sup>; Fgf10<sup>-/-</sup>*) and double conditional mutant (DCKO; *Fgf3<sup>-/-</sup>; Fgf10<sup>-/-</sup>; Tg(Pax2-Cre)/+*) otic vesicles (ov) immunostained to detect pHH3 (green) and E-Cadherin (red). Scale bar in A (100  $\mu\text{m}$ ) applies to B. (C) Quantification of pHH3-positive cells per otic epithelial area shows no significant difference between genotypes. (C') Quantification of cleaved-caspase-3 cells per otic epithelial area shows no significant difference between genotypes at E9.5. (D) Transverse section at the level of the otic vesicle of an E10.5 X-gal-stained *Rosa26<sup>LacZR/+</sup>; Sox1<sup>Cre/+</sup>* embryo shows CRE activity restricted to the neural tube. (E-G') Lateral views of otic vesicles from freshly dissected E9.5 embryos show that in the global absence of *Fgf10*, hindbrain *Fgf3* is required to develop a normally sized otic vesicle (G'). *Fgf* genotypes are indicated above and *Cre* status is to the right of each row. Dashed lines denote the external circumference of the otic epithelium. The scale bar and orientation axes in E apply to E-G'. Abbreviations: D, dorsal; M, medial, nt, neural tube; ov, otic vesicle; P, posterior.

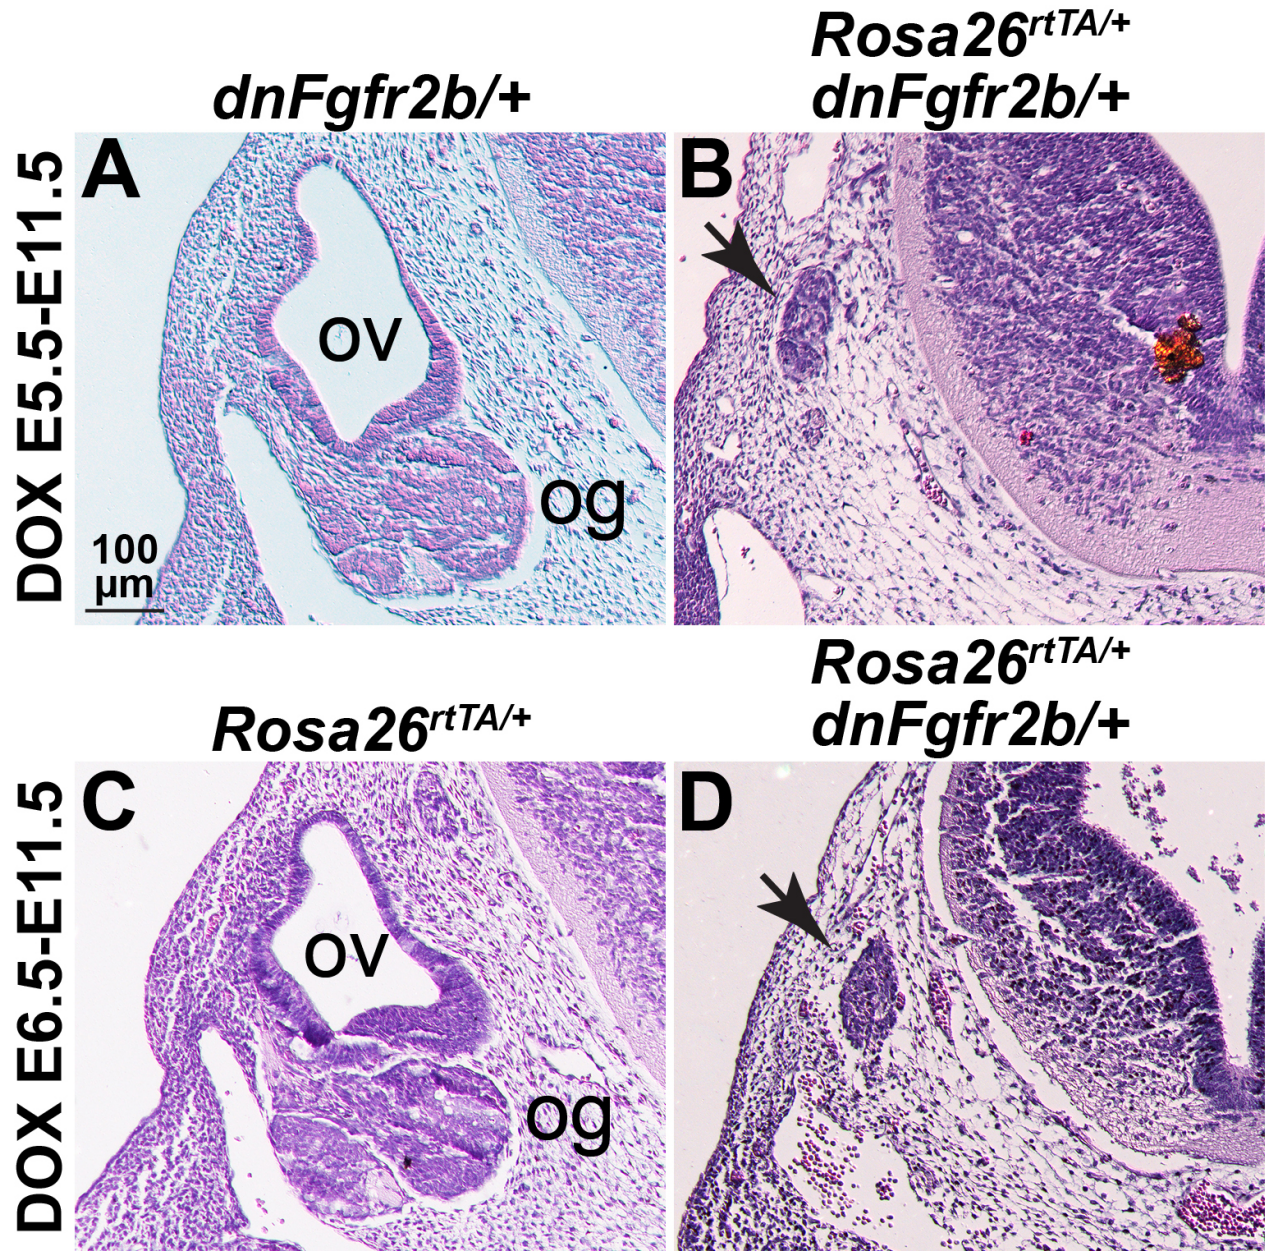

**Figure S3. Induction of dnFGFR2b prior to otic placode induction blocks otic vesicle formation.** Transverse hematoxylin and eosin-stained sections of embryos derived from *Tg(tetO-dnFgfr2b)/+* females crossed to *Rosa26<sup>rtTA/+</sup>* males and fed DOX-chow between E5.5-E11.5 (A,B) or E6.5-E11.5 (C,D). Genotypes are indicated above each column and DOX induction conditions indicated to the left of each row. Remnant otic tissue in the experimental samples is indicated with an arrow (B,D). The scale bar in A applies to all panels. Abbreviations: og, otic ganglion; ov, otic vesicle.

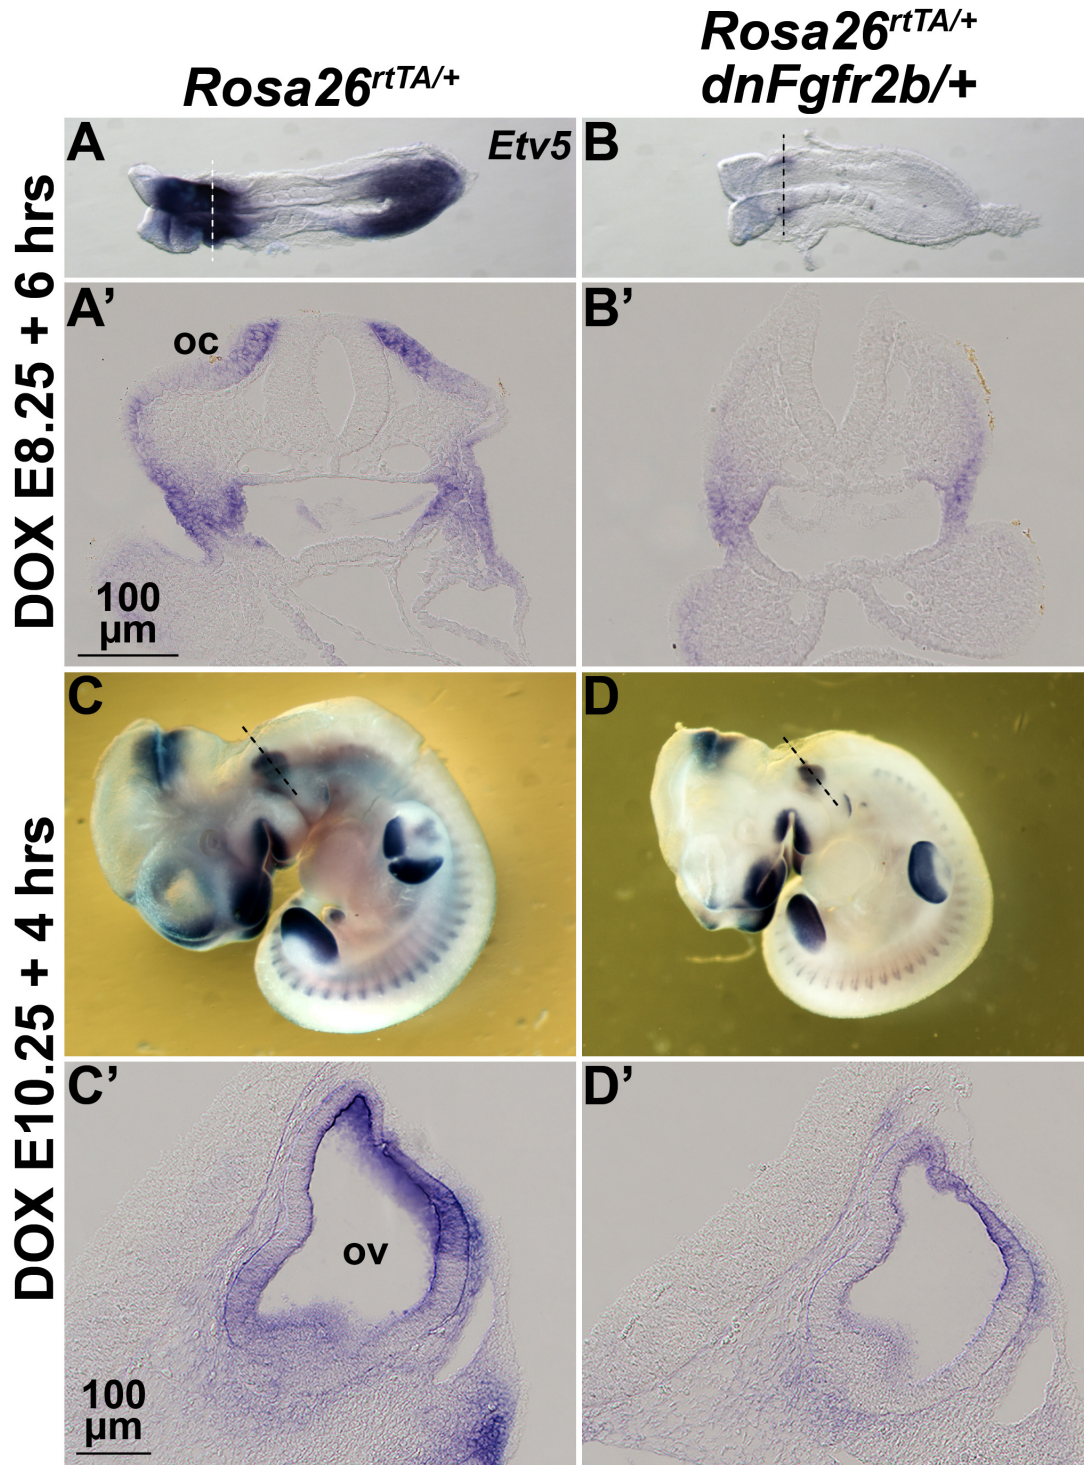

**Figure S4. Inhibition of FGFR2b ligands has a rapid onset.** Whole-mount ISH with an *Etv5* probe on embryos derived from wild type females crossed to *Rosa26<sup>rtTA/rtTA</sup>;Tg(tetO-dnFgfr2b)/+* males and treated with DOX for six hours beginning at E8.25 (A-B') or 4 hours beginning at E10.5 (C-D'). Genotypes are indicated above each column. Dashed lines (A,B,C,D) indicate the planes of transverse sections shown in A',B',C',D'. Abbreviations: oc, otic cup; ov, otic vesicle.

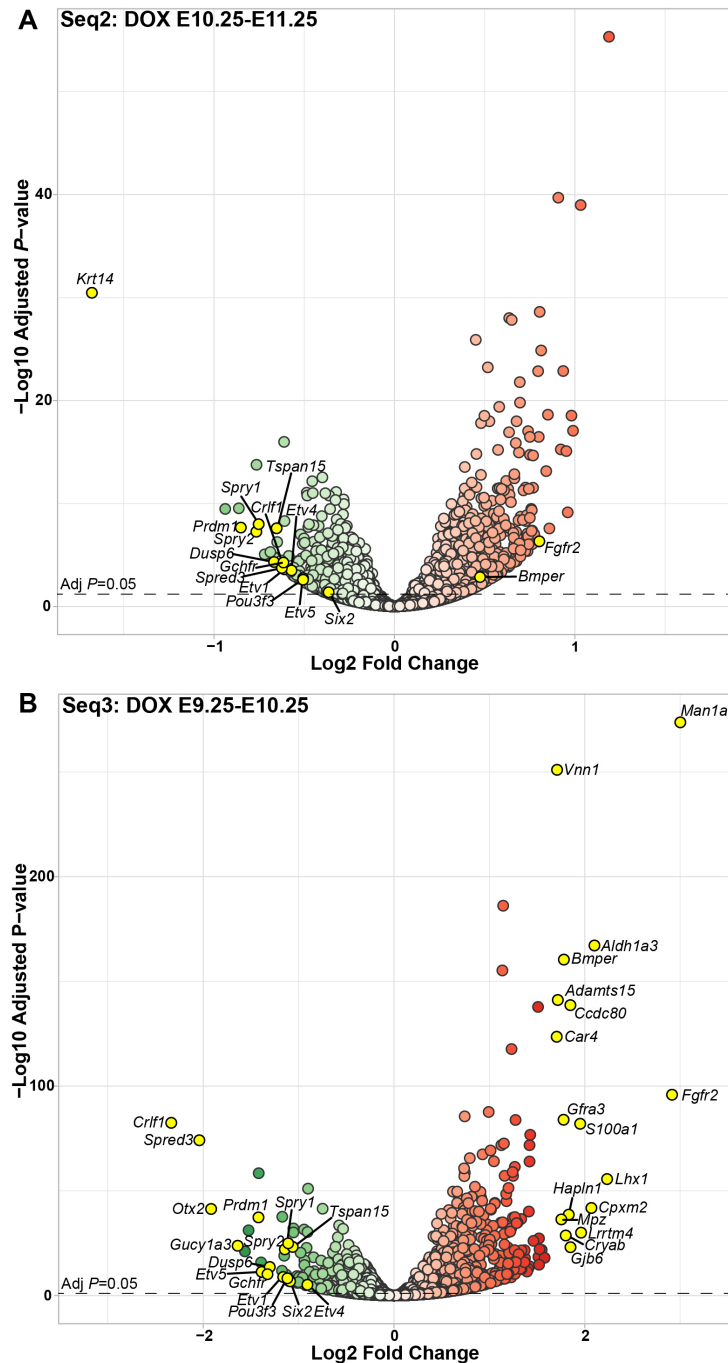

**Figure S5. Differential RNA-Seq analysis of otic epithelia subjected to overlapping and longer dnFGFR2b induction windows define a stage-specific FGFR2b signaling response during early otic morphogenesis.** (A) Volcano plot of the RNA-Seq2 (DOX exposure E10.25-E11.25), and (B) RNA-Seq3 (DOX exposure from E9.25-E10.25) datasets. Down-regulated (green) and up-regulated (red) genes were identified using a paired statistical model (see Methods). The statistical significance of the differential expression is shown on the y-axis and the fold change is shown on the x-axis. Names for genes highlighted in yellow include all those with a fold-change > 1.5, plus known FGFR2b target genes and genes that we pursued for expression validation.

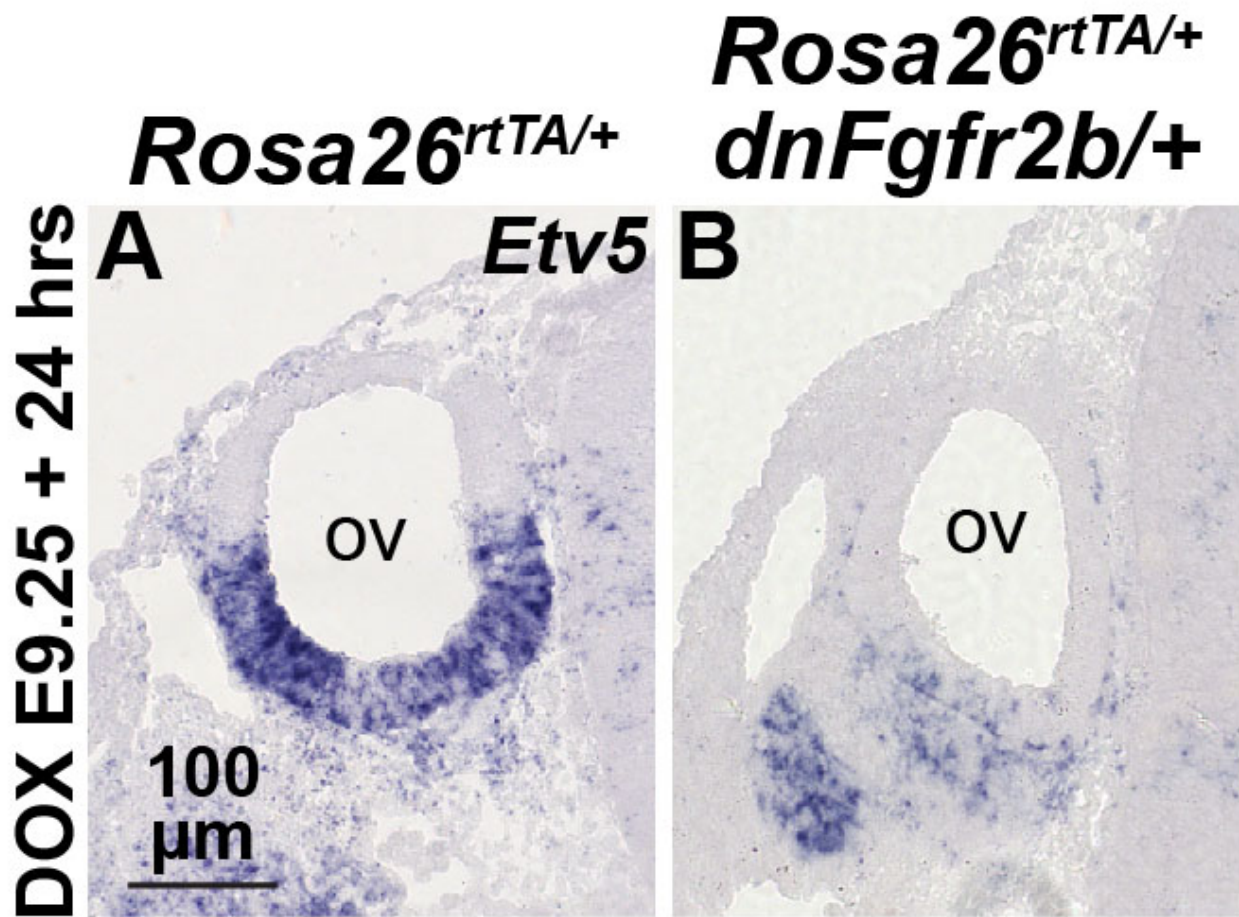

**Figure S6. *Etv5* is lost from the otic vesicle following RNA-Seq3 dnFGFR2b induction conditions.** ISH using an *Etv5* probe on sections taken through the otic vesicle (ov) and ganglion (og) from control (A) (*Rosa26<sup>rtTA/+</sup>*) or *dnFgfr2b*-expressing embryos (B) subjected to Seq3 induction conditions (E9.25-E10.25, n=3 each).

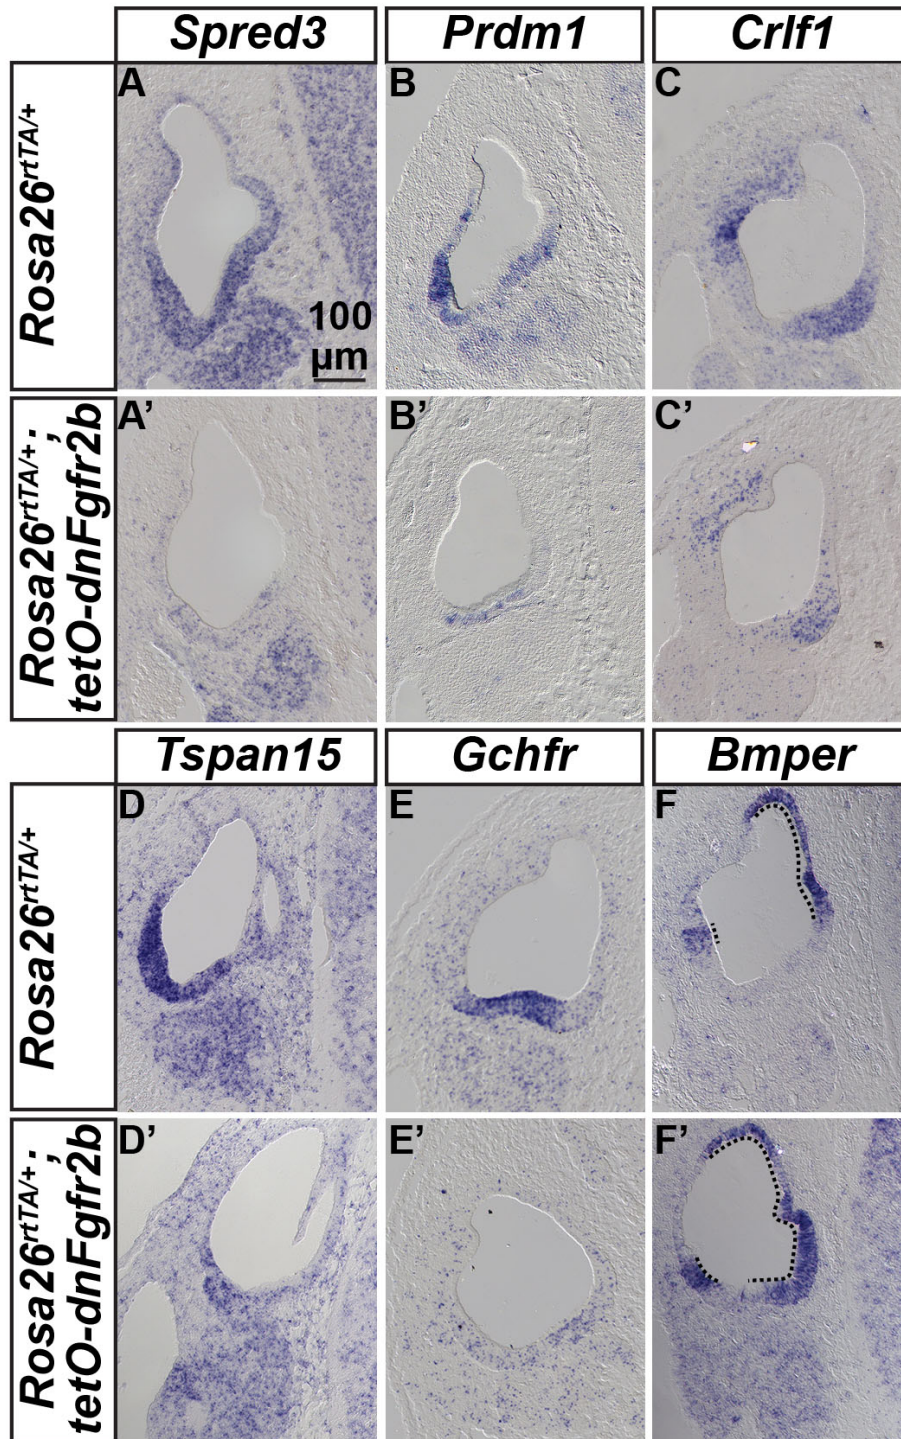

**Figure S7. Validation of the subset of new FGFR2b ligand-dependent genes differentially expressed under RNA-Seq2 induction conditions.** ISH of transverse E11.25 paraffin sections of otocysts exposed to Seq2 induction conditions (DOX, E10.25-E11.25). Probes are indicated in the boxes above each column and genotypes are indicated to the left of each row (controls A-F, dnFGFR2b-expressing embryos A'-F', n=3 each). Dorsal is up, medial is to the right. The scale bar in A applies to all panels. The dotted line in F and F' demarks *Bmper* expression.

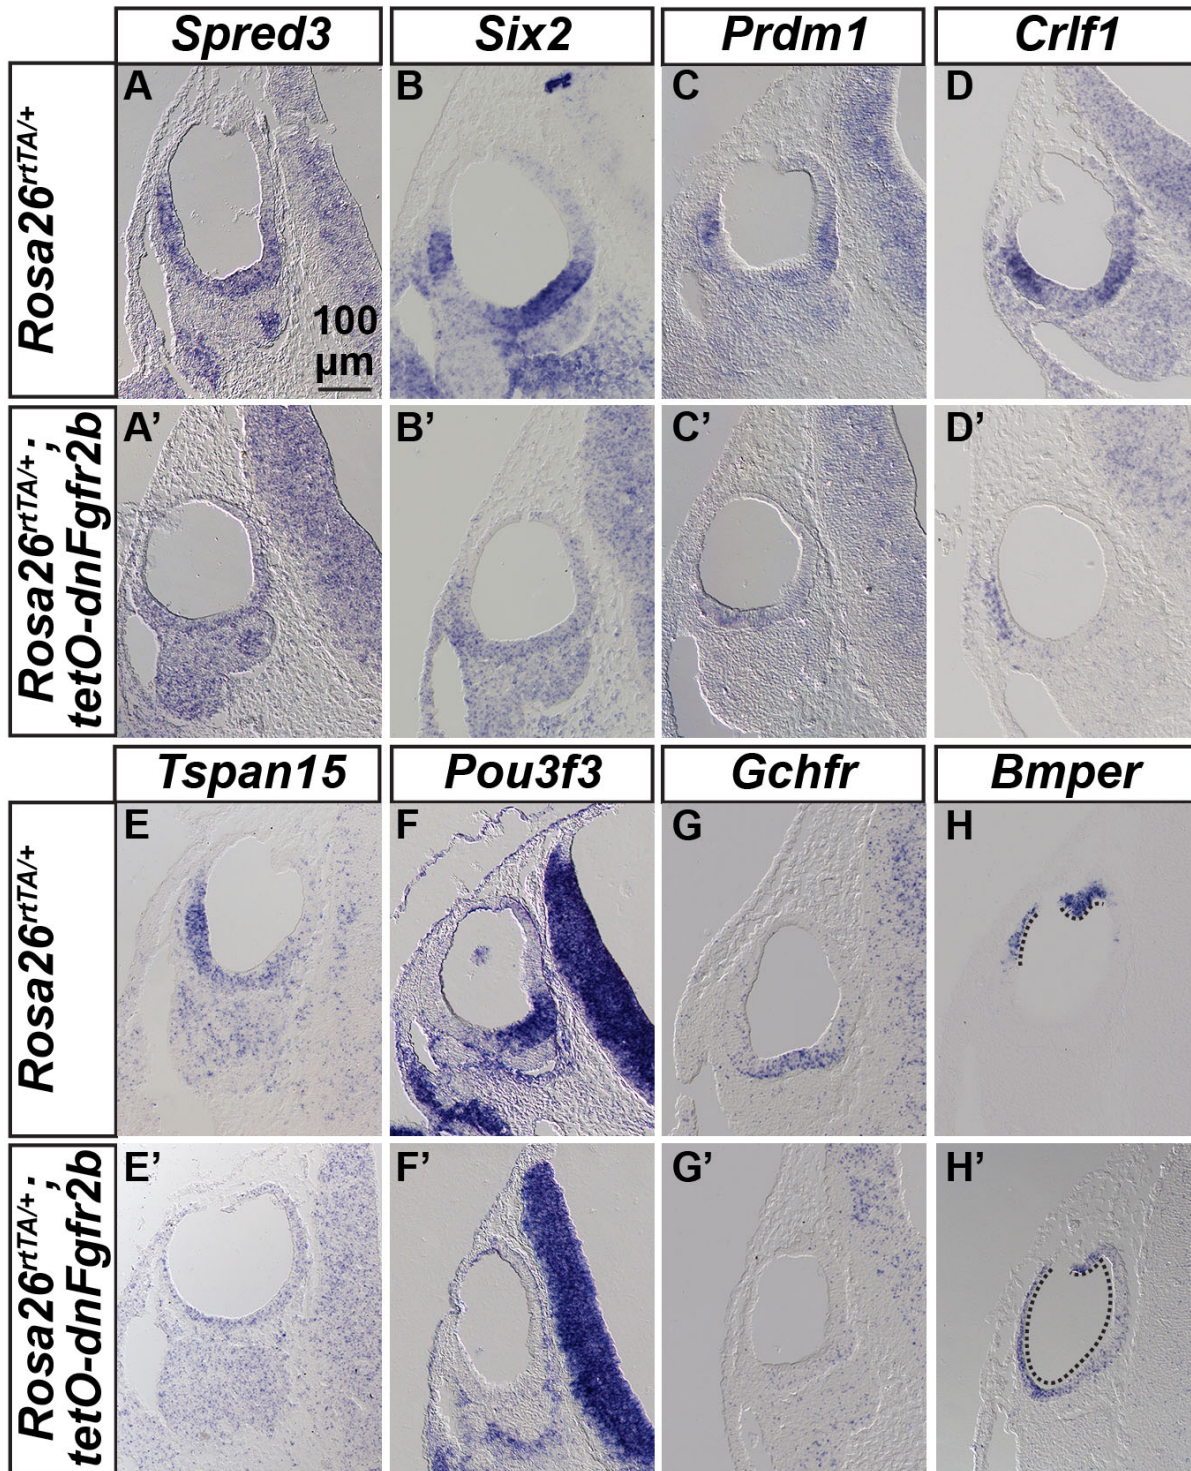

**Figure S8. Validation of the subset of new FGFR2b ligand-dependent genes differentially expressed under RNA-Seq3 induction conditions.** ISH of transverse E10.25 paraffin sections of otocysts exposed to Seq3 induction conditions (DOX, E9.25-E10.25). Probes are indicated in the boxes above each column and genotypes are indicated to the left of each row (controls A-H, dnFGFR2b-expressing embryos A'-H', n=3 each). Dorsal is up, medial is to the right. The scale bar in A applies to all panels. The dotted line in H and H' demarks *Bmper* expression.



Table S1

Phenotypes resulting from loss of epithelial *Fgf3* and *Fgf10* alleles in the Tg(*Pax2-Cre*) lineage

| CRE negative | <i>Fgf3</i> <sup>-/-</sup> |                             | <i>Fgf3</i> <sup>C/+</sup> ;<br><i>Fgf10</i> <sup>C/+</sup> |                             | <i>Fgf3</i> <sup>-/-</sup> ;<br><i>Fgf10</i> <sup>C/+</sup> |                             | <i>Fgf3</i> <sup>C/+</sup> ;<br><i>Fgf10</i> <sup>-/-</sup> |                             | <i>Fgf3</i> <sup>-/-</sup> ;<br><i>Fgf10</i> <sup>-/-</sup> |                             |
|--------------|----------------------------|-----------------------------|-------------------------------------------------------------|-----------------------------|-------------------------------------------------------------|-----------------------------|-------------------------------------------------------------|-----------------------------|-------------------------------------------------------------|-----------------------------|
|              |                            | <i>Fgf10</i> <sup>-/-</sup> |                                                             | <i>Fgf10</i> <sup>C/+</sup> |                                                             | <i>Fgf10</i> <sup>C/+</sup> |                                                             | <i>Fgf10</i> <sup>-/-</sup> |                                                             | <i>Fgf10</i> <sup>-/-</sup> |
| C0           | <b>4</b>                   | 0                           | <b>10</b>                                                   |                             | 3                                                           |                             | 0                                                           |                             | 0                                                           |                             |
| C1           | 0                          | <b>4</b>                    | 1                                                           |                             | <b>9</b>                                                    |                             | 6                                                           |                             | 0                                                           |                             |
| C2           | 0                          | 3                           | 0                                                           |                             | 0                                                           |                             | <b>6</b>                                                    |                             | <b>6</b>                                                    |                             |
| C3           | 0                          | 0                           | 0                                                           |                             | 0                                                           |                             | 2                                                           |                             | 0                                                           |                             |
| C4           | 0                          | 0                           | 0                                                           |                             | 0                                                           |                             | 0                                                           |                             | 0                                                           |                             |
| C5           | 0                          | 0                           | 0                                                           |                             | 0                                                           |                             | 0                                                           |                             | 0                                                           |                             |

  

| CRE positive | <i>Fgf3</i> <sup>-/-</sup> |                             | <i>Fgf3</i> <sup>C/+</sup> ;<br><i>Fgf10</i> <sup>C/+</sup> |                             | <i>Fgf3</i> <sup>-/-</sup> ;<br><i>Fgf10</i> <sup>C/+</sup> |                             | <i>Fgf3</i> <sup>C/+</sup> ;<br><i>Fgf10</i> <sup>-/-</sup> |                             | <i>Fgf3</i> <sup>-/-</sup> ;<br><i>Fgf10</i> <sup>-/-</sup> |                             |
|--------------|----------------------------|-----------------------------|-------------------------------------------------------------|-----------------------------|-------------------------------------------------------------|-----------------------------|-------------------------------------------------------------|-----------------------------|-------------------------------------------------------------|-----------------------------|
|              |                            | <i>Fgf10</i> <sup>-/-</sup> |                                                             | <i>Fgf10</i> <sup>C/+</sup> |                                                             | <i>Fgf10</i> <sup>C/+</sup> |                                                             | <i>Fgf10</i> <sup>-/-</sup> |                                                             | <i>Fgf10</i> <sup>-/-</sup> |
| C0           | <b>8</b>                   | 0                           | 0                                                           |                             | 0                                                           |                             | 0                                                           |                             | 0                                                           |                             |
| C1           | 0                          | 2                           | <b>9</b>                                                    |                             | 3                                                           |                             | 0                                                           |                             | 0                                                           |                             |
| C2           | 0                          | <b>8</b>                    | 3                                                           |                             | <b>11</b>                                                   |                             | 0                                                           |                             | 0                                                           |                             |
| C3           | 0                          | 6                           | 0                                                           |                             | 0                                                           |                             | 2                                                           |                             | 0                                                           |                             |
| C4           | 0                          | 0                           | 0                                                           |                             | 0                                                           |                             | <b>13</b>                                                   |                             | 0                                                           |                             |
| C5           | 0                          | 0                           | 0                                                           |                             | 0                                                           |                             | 2                                                           |                             | <b>16</b>                                                   |                             |

### Gross phenotypic classes

C0=normal morphology

C1=reduced PSCC, normal cochlea

C2=absent PSCC, normal cochlea

C3=absent PSCC/variable lsc and ascc, short cochlea

C4=unfused vertical canal pouches, shortened cochlea

C5=spheroid chamber lacking distinct vestibule or cochlea

Scoring of paintfill phenotypic classes by *Fgf* genotype and *Pax2-Cre* status. C0-C4 were defined previously by Urness et al. (2015) for *Fgf10* heterozygous and homozygous germline mutants. C5, the most severe class, was never observed in *Fgf10* germline mutants. The most prevalent phenotype for each genotype is indicated in bold; examples of the most prevalent phenotypes are shown in Figure 2L-O'. The distribution of phenotypes is significantly different between the F10cKO and F3cHet;F10cKO ears ( $P < 0.0001$ ; Fisher's exact test; SPSS software).

**Table S2****cDNA clones used to prepare digoxigenin-labeled cRNA antisense transcripts for in situ hybridization**

| <b>Gene</b>    | <b>Insert size (bp)</b> | <b>Enzyme (antisense)</b> | <b>Polymerase</b> | <b>Source</b>                              | <b>Reference</b>         |
|----------------|-------------------------|---------------------------|-------------------|--------------------------------------------|--------------------------|
| <i>Bmp4</i>    | ~900                    | AccI                      | T7                | Anne Boulet                                | Jones et al., 1991       |
| <i>Sox9</i>    | ~400                    | EcoRI                     | T3                | Anne Boulet                                | Wright et al., 1995      |
| <i>Fgf3</i>    | 373                     | BamHI                     | T3                | Nancy Manley                               | Wright and Mansour, 2003 |
| <i>Fgf10</i>   | ~550                    | EcoRI                     | SP6               | David Ornitz                               | Xu et al., 1998          |
| <i>Etv5</i>    | 458                     | EcoRI                     | T7                | GenBank<br>NM_023794<br>Residues 1309-1766 | Li et al., 2007          |
| <i>Gbx2</i>    | ~1000                   | HindIII                   | T7                | Gail Martin                                | Wassarman et al., 1997   |
| <i>Sox2</i>    | 530                     | HindIII                   | T7                | Olivia Bermingham-McDonogh                 | Wood and Episkopou, 1999 |
| <i>Foxg1</i>   | ~400                    | HindIII                   | T7                | GenBank<br>A1592649<br>Residues 2615-2976  | Pauley et al., 2006      |
| <i>Pax2</i>    | ~500                    | BamHI                     | T3                | Peter Gruss                                | Dressler et al., 1990    |
| <i>Neurod1</i> | ~1500                   | EcoRI                     | T3                | Gary Gaufo                                 | Liu et al., 2000         |
| <i>Neurog1</i> | ~2000<br>(hydrolyzed)   | XhoI                      | T7                | Quifu Ma                                   | Ma et al., 2000          |

Purified plasmid DNA was digested with the indicated restriction enzyme and then transcribed with the indicated RNA polymerase to produce antisense probes for ISH.

Table S3

## Primers used to generate DNA fragments for cRNA probe generation.

| Gene           | Primers | Primer sequences (5'-3')  | Product size (bp) |
|----------------|---------|---------------------------|-------------------|
| <i>Spred3</i>  | F-916   | TTCTACCGTTCCTACTGGGATTCC  | ~675              |
|                | R-915   | CCAAACCAGCTCAACAATCC      |                   |
| <i>Six2</i>    | F-936   | AGTTCCGAGGATGAGAAGACG     | ~510              |
|                | R-937   | CTTGCCTAGTTCAAGACTCGG     |                   |
| <i>Prdm1</i>   | F-908   | ATCCATCTCTGCAGCCTCAAGG    | ~490              |
|                | R-907   | GCAGATCTGGAGTCATGTACAAGC  |                   |
| <i>Tspan15</i> | F-968   | TACTGTACATCACCCGTGTGG     | ~625              |
|                | R-969   | AGCCTTACAGAGGACTCAAGG     |                   |
| <i>Pou3f3</i>  | F-925   | GGGACATCTCGTTTATACTGTGG   | ~745              |
|                | R-926   | TGTCTTTCCACACCCTTTTATCGG  |                   |
| <i>Gchfr</i>   | F-939   | ACGAATACTACGTCAACGACC     | ~460              |
|                | R-940   | GAACAACCACTTGTGAGAGCC     |                   |
| <i>Bmper</i>   | F-970   | GTGATAACTGGAATGAGATCGG    | ~670              |
|                | R-971   | GTGAAATCTGACAGACTCTCCTTGG |                   |
| <i>Crlf1</i> * | F-946   | AGCAGTCAGGAGACAATCTGG     | ~620              |
|                | R-947   | AACGCACTTGGACAAGTAAACGG   |                   |

Forward (F) and reverse (R) primers used to PCR-amplify 3'UTR regions of each indicated gene from mouse genomic DNA, except *Crlf1*, which was amplified from a cDNA clone. All reverse primers include the T7 promoter sequence (GGATCCTAATACGACTCACTATAGGGAG) at the 5' end. The antisense-RNA strand was produced by transcription of the PCR product using T7 RNA polymerase. *Crlf1* cDNA 3 from DNASU Arizona State University Clone # MmCD00295268 (NCBI NM\_018827.2, Image: 100063851).

**Table S4.****Sheet 1: Fgfs, Fgfrs, targets**

Compilation of normalized mean control and experimental count values from DSeq2 paired analyses for *Fgfs*, *Fgfrs* and select target genes with corresponding log2FoldChange and adjusted *P*-values (padj) from the RNA-Seq1, -Seq2 and -Seq3 datasets. Ensembl mouse gene numbers are shown (col A) if the gene was detected in at least one of the datasets. Gene names (col B) follow mouse conventions. Log2FoldChange cells are shaded in red to indicate significant upregulation and in green to indicate significant downregulation, roughly corresponding to the scheme used in the volcano plots. Padj values were derived following the Benjamini-Hochberg multiple testing correction. NA in the padj column indicates that there were outlier counts present in one or more groups.

**Sheet 2: IPA,GO \_paired top 5 path**

Output of Ingenuity Pathway and GOrilla analyses. Rows 3-21 Ingenuity Pathway Analysis (IPA) output for the top 5 regulated pathways in each RNA-seq dataset. The cutoff for differential expression *P*-value in each dataset was 0.05. There was no cutoff for fold-change. Column heading definitions are shown on the sheet. Rows 35-61. GOrilla process analysis output for downregulated genes with an adjusted *P*-value of <0.05 and no fold-change cutoff in RNA-Seq1-3 paired datasets and GOrilla function analysis for downregulated genes in RNA-Seq1 with a Max AdjP-value <0.05 and log2(fold-change) >0.585. (<http://cbl-gorilla.cs.technion.ac.il/>) Column heading definitions are shown on the sheet.

**Sheet 3: Seq1 GSEA\_AORL,NISHIO**

Gene set enrichment analysis (GSEA) of all 16232 RNA-Seq1 genes ranked by fold-change, using 93 human hearing loss genes listed in Nishio et al. (2015) (<https://software.broadinstitute.org/gsea/doc/GSEAUUserGuideFrame.html>), including the enrichment table (cols A-H) and plot. GSEA column heading and plot definitions are shown on the sheet.

**Sheet 4: Seq1 GSEA\_JAX**

Gene set enrichment analysis (GSEA) of all 16232 RNA-Seq1 genes ranked by fold-change, using 258 mouse inner ear-associated genes listed in Ohlemiller et al. (2016) (<https://software.broadinstitute.org/gsea/doc/GSEAUUserGuideFrame.html>) including the enrichment table (cols A-H) and plot. GSEA column heading and plot definitions are shown on the sheet.

**Sheet 5: intersect datasets**

Intersections of downregulated and upregulated RNA-Seq1-3 gene lists with corresponding Venn diagrams generated using GeneVenn software (<http://genevenn.sourceforge.net/>). Downregulated genes with an AdjP <0.05 and FC>1.5 were overlapped separately from upregulated genes with an AdjP <0.01 and FC> 2. Gene lists comprising overlap in all three sets and for each pair are shown. Annotations of the gene lists are shown on the sheet.

[Click here to Download Table S4](#)
